# Supplementary material for: Antibodies targeting a quaternary site on SARS-CoV-2 spike glycoprotein prevent viral receptor engagement by conformational locking
Source: PubMed Central journal article supplement (PMC10588992; doi:10.1016/j.immuni.2023.09.003), 2023-10-10
Supplement: mmc1.pdf [file mmc1.pdf]

**Supplemental information**

**Antibodies targeting a quaternary site  
on SARS-CoV-2 spike glycoprotein prevent viral  
receptor engagement by conformational locking**

**Lihong Liu, Ryan G. Casner, Yicheng Guo, Qian Wang, Sho Iketani, Jasper Fuk-Woo Chan, Jian Yu, Bernadeta Dadonaite, Manoj S. Nair, Hiroshi Mohri, Eswar R. Reddem, Shuofeng Yuan, Vincent Kwok-Man Poon, Chris Chung-Sing Chan, Kwok-Yung Yuen, Zizhang Sheng, Yaoxing Huang, Jesse D. Bloom, Lawrence Shapiro, and David D. Ho**

**Table S1. Subject information.** See also **Figure 1**.

| <b>Sample ID</b> | <b>Symptoms</b>                                                                                                     | <b>Infection &amp; vaccination history</b> | <b>Days between infection and 1<sup>st</sup> dose</b> | <b>Days between 1<sup>st</sup> dose and 2<sup>nd</sup> dose</b> | <b>Blood collection days post 2<sup>nd</sup> vaccination</b> |
|------------------|---------------------------------------------------------------------------------------------------------------------|--------------------------------------------|-------------------------------------------------------|-----------------------------------------------------------------|--------------------------------------------------------------|
| Patient 12       | Shortness of breath, fatigue, muscle pain, joint pain, fever, headache, lack of taste, lack of smell, and confusion | R.1 (B.1.1.316.1)/ mRNA-1273/<br>mRNA-1273 | 20                                                    | 28                                                              | 7                                                            |

**Table S2. CryoEM data collection and model refinement.** See also **Figure 2**.

|                                                 | <b>SARS-CoV-2 S2P<br/>+ 12-16 Fab</b> | <b>SARS-CoV-2 S2P<br/>+ 12-19 Fab</b> | <b>SARS-CoV-2 S2P<br/>+ 4-33 Fab</b> |
|-------------------------------------------------|---------------------------------------|---------------------------------------|--------------------------------------|
| <b>EMDB ID</b>                                  | 26583                                 | 26584                                 | 26964                                |
| <b>PDB ID</b>                                   | 7UKL                                  | 7UKM                                  | 8CSJ                                 |
| <b>Data Collection</b>                          |                                       |                                       |                                      |
| Microscope                                      | FEI Titan Krios                       | FEI Titan Krios                       | FEI Titan Krios                      |
| Voltage (keV)                                   | 300                                   | 300                                   | 300                                  |
| Magnification                                   | 105k                                  | 105k                                  | 81k                                  |
| Defocus Range ( $\mu\text{m}$ )                 | -0.8/-2.0                             | -0.8/-2.0                             | -0.8/-2.0                            |
| Camera                                          | Gatan K3 BioQuantum                   | Gatan K3 BioQuantum                   | Gatan K3 BioQuantum                  |
| Pixel Size ( $\text{\AA}/\text{pix}$ )          | 0.83                                  | 0.83                                  | 1.07                                 |
| Recording Mode                                  | counting                              | counting                              | counting                             |
| Dose Rate ( $e^-/\text{pixel}/\text{s}$ )       | 16                                    | 16                                    | 16                                   |
| Electron Dose ( $e^-/\text{\AA}^2$ )            | 58                                    | 58                                    | 42                                   |
| <b>Data Processing</b>                          |                                       |                                       |                                      |
| Software                                        | cryoSPARC v3.3                        | cryoSPARC v3.3                        | cryoSPARC v3.3                       |
| Micrographs used                                | 3,691                                 | 4,042                                 | 6,100                                |
| Number of Particles                             | 463,850                               | 256,243                               | 420,343                              |
| Symmetry                                        | C1                                    | C1                                    | C3                                   |
| Box Size (pix)                                  | 440                                   | 440                                   | 384                                  |
| Global Map FSC0.143 ( $\text{\AA}$ )            | 3.09                                  | 3.03                                  | 3.56                                 |
| <b>Refinement and Validation</b>                |                                       |                                       |                                      |
| Software                                        | Phenix, ISOLDE, Rosetta               | Phenix, ISOLDE, Rosetta               | Phenix, ISOLDE                       |
| Initial Model Used                              | 6XM5(Spike), AlphaFold(Fab)           | 6XM5(Spike), AlphaFold(Fab)           | 7LAB(Spike), SAbPred(Fab)            |
| Number of Atoms                                 | 30,234                                | 30,145                                | 32,073                               |
| Protein Residues                                | 3,795                                 | 3,771                                 | 4,038                                |
| Ligands                                         | NAG: 48                               | NAG: 47                               | NAG: 53                              |
| Model vs. Data CC (mask)                        | 0.79                                  | 0.87                                  | 0.7                                  |
| <b>RMS deviations</b>                           |                                       |                                       |                                      |
| Bond lengths ( $\text{\AA}$ ) ( $\# >4\sigma$ ) | 0                                     | 0                                     | 1                                    |
| Bond angles ( $^\circ$ ) ( $\# >4\sigma$ )      | 17                                    | 2                                     | 65                                   |
| MolProbity Score                                | 1.25                                  | 1.07                                  | 1.96                                 |
| Clashscore (all atom)                           | 2.42                                  | 1.41                                  | 3.57                                 |
| Poor rotamers (%)                               | 0                                     | 0                                     | 0                                    |
| <b>Ramachandran plot</b>                        |                                       |                                       |                                      |
| Favored (%)                                     | 96.55                                 | 96.84                                 | 92.95                                |
| Allowed (%)                                     | 3.45                                  | 3.16                                  | 7.05                                 |
| Outliers (%)                                    | 0                                     | 0                                     | 0                                    |

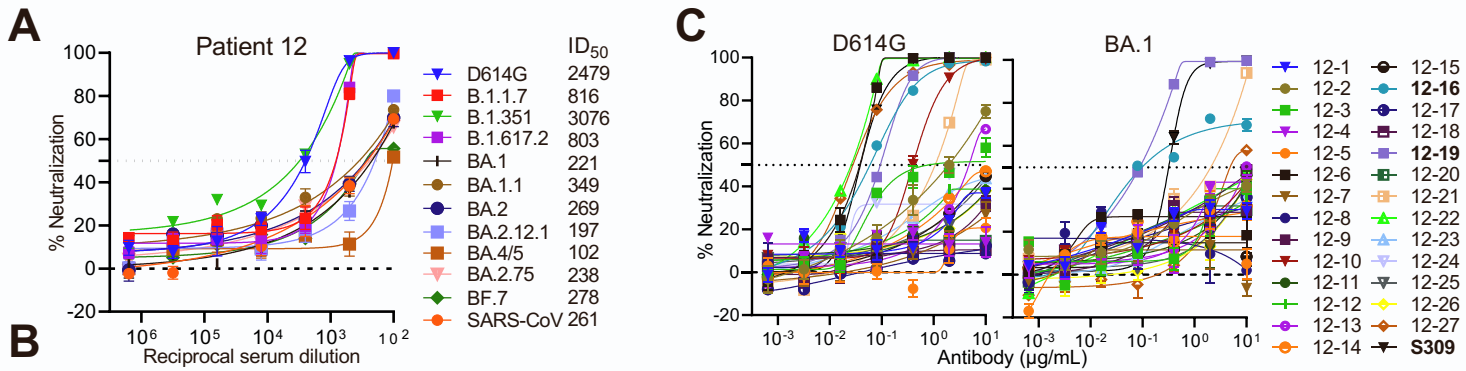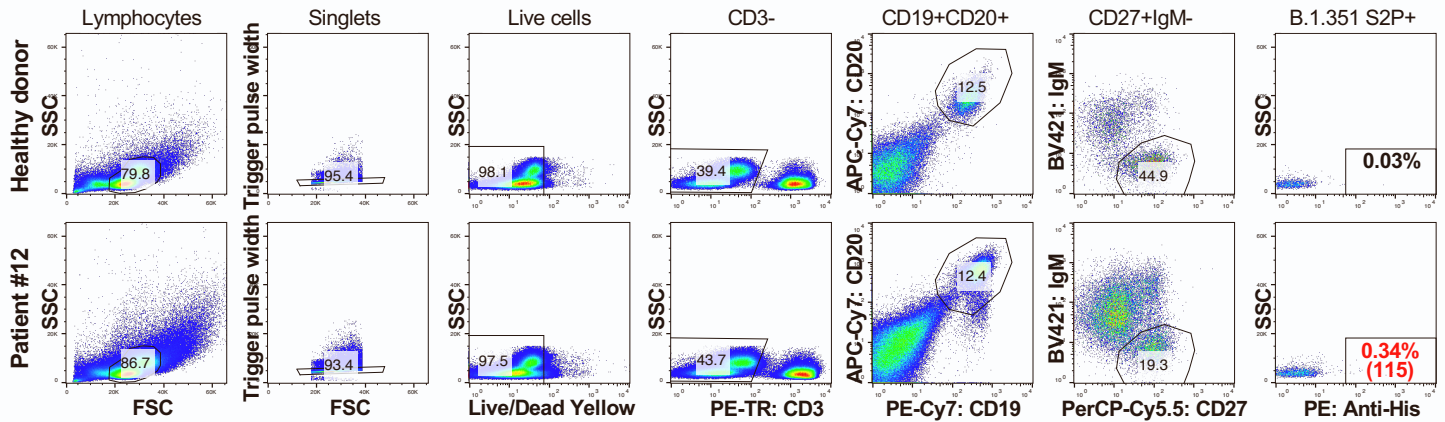

**D**

| IC <sub>50</sub> (μg/mL) | D614G | BA.1  | IC <sub>50</sub> (μg/mL) | D614G | BA.1  | IC <sub>50</sub> (μg/mL) | D614G | BA.1  |
|--------------------------|-------|-------|--------------------------|-------|-------|--------------------------|-------|-------|
| 12-1                     | >10   | >10   | 12-10                    | 0.396 | >10   | 12-19                    | 0.094 | 0.088 |
| 12-2                     | 1.942 | >10   | 12-11                    | >10   | >10   | 12-20                    | >10   | >10   |
| 12-3                     | 0.860 | >10   | 12-12                    | >10   | >10   | 12-21                    | 1.069 | 2.051 |
| 12-4                     | >10   | >10   | 12-13                    | 4.789 | 9.910 | 12-22                    | 0.026 | >10   |
| 12-5                     | >10   | >10   | 12-14                    | >10   | >10   | 12-23                    | >10   | >10   |
| 12-6                     | 0.038 | >10   | 12-15                    | >10   | >10   | 12-24                    | >10   | >10   |
| 12-7                     | >10   | >10   | 12-16                    | 0.059 | 0.097 | 12-25                    | >10   | >10   |
| 12-8                     | >10   | >10   | 12-17                    | >10   | >10   | 12-26                    | >10   | >10   |
| 12-9                     | >10   | >10   | 12-18                    | >10   | >10   | 12-27                    | 0.028 | 4.839 |
| S309                     | 0.039 | 0.318 |                          |       |       |                          |       |       |

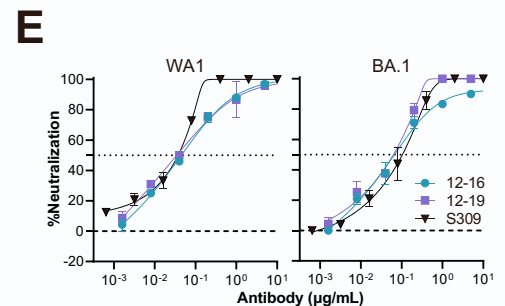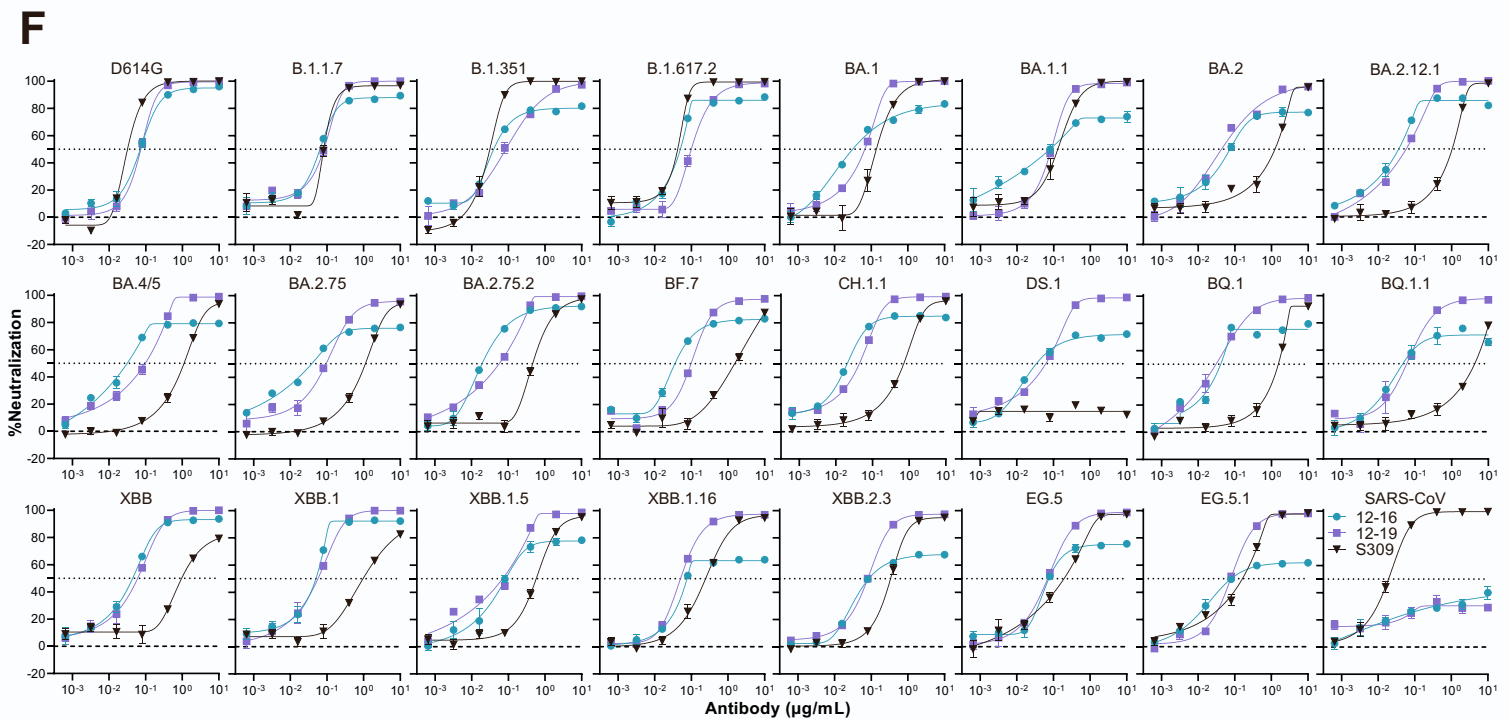



**Figure S1. Neutralization potency of Patient 12 serum and the isolated mAbs.**

- (A) Neutralization curves and ID<sub>50</sub> titers of the convalescent serum from Patient 12 against pseudotyped SARS-CoV-2 variants and SARS-CoV.
  - (B) Gating strategy for sorting of trimer-specific memory B cells by flow cytometry. The inset numbers indicate the percentage (and absolute number) of spike trimer-specific memory B cells obtained from healthy donor 1 and Patient 12.
  - (C) Neutralization curves of 27 isolated mAbs from Patient 12 against D614G and BA.1 pseudotyped viruses.
  - (D) Neutralization IC<sub>50</sub> titers summarized from panel C.
  - (E) Neutralization curves of 12-16, 12-19, and S309 against authentic SARS-CoV-2 WA1 and BA.1.
  - (F) Neutralization curves of 12-16, 12-19, and S309 against both SARS-CoV-2 and SARS-CoV pseudoviruses.
- Data are representative of those obtained in three independent experiments and shown as mean ± SEM.

| mAbs  | HV          | HD         | HJ       | Isotype  | H_SHM | CDRH3_len | HCDR3                    | LV          | LJ       | L_SHM | CDRL3_len | LCDR3       |
|-------|-------------|------------|----------|----------|-------|-----------|--------------------------|-------------|----------|-------|-----------|-------------|
| 12-16 | IGHV3-30*18 | IGHD3-9*01 | IGHJ6*02 | IGHG3*04 | 1.70% | 25        | AKDLSFYDISTGYYPQSYNSGTDV | IGLV3-1*01  | IGLJ*01  | 1.40% | 11        | QGWRDSTGYVV |
| 12-19 | IGHV3-33*01 | IGHD3-9*01 | IGHJ6*02 | IGHG1*04 | 2.70% | 26        | ARDRTPVYDILTGYWPPRPVDMVD | IGKV2-29*02 | IGKJ2*02 | 2.30% | 9         | MQSIQLPFT   |

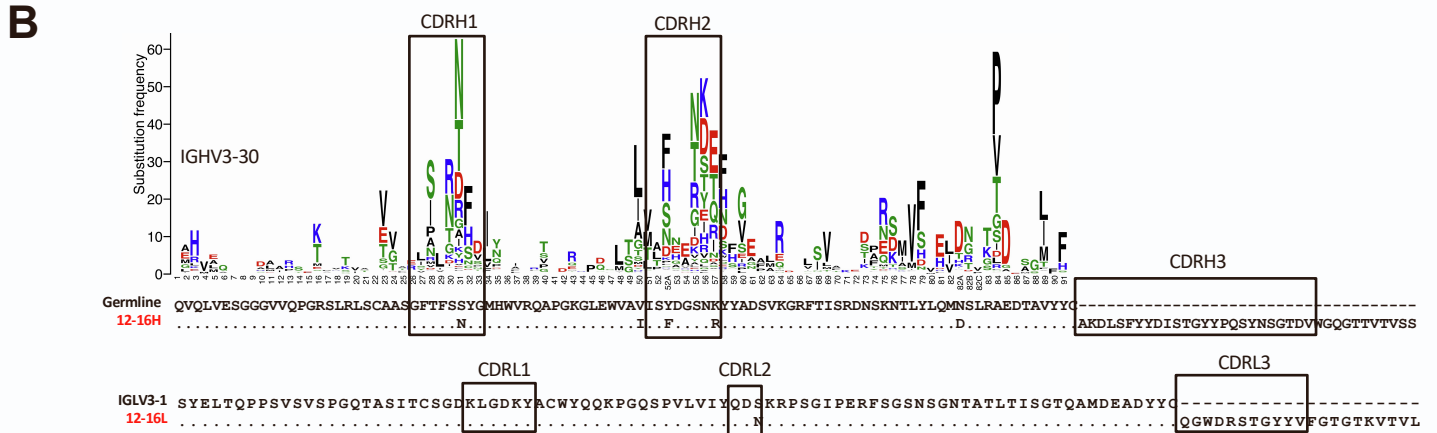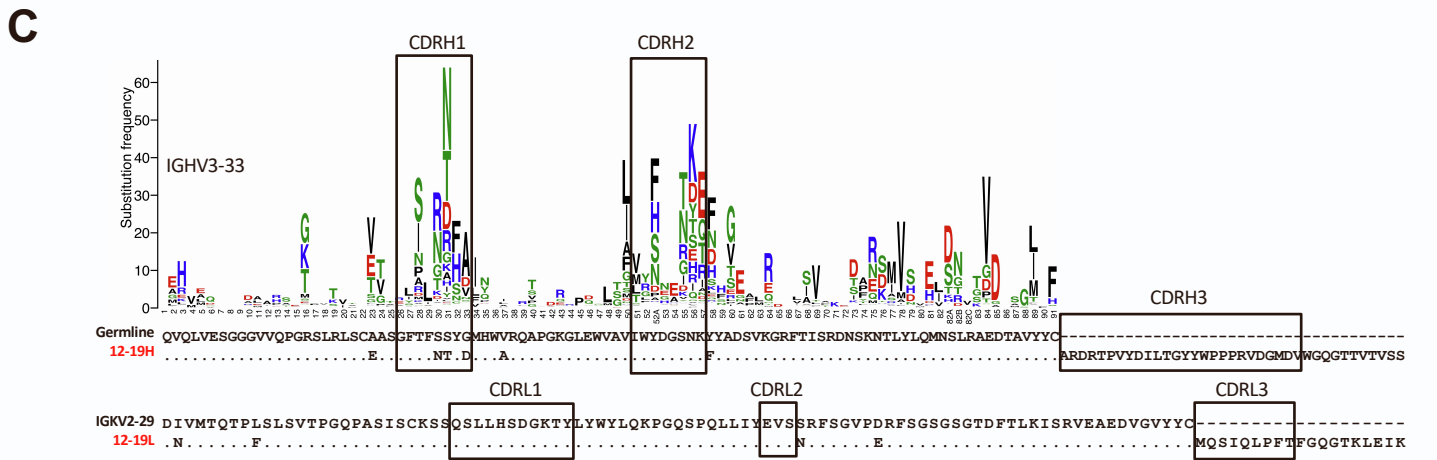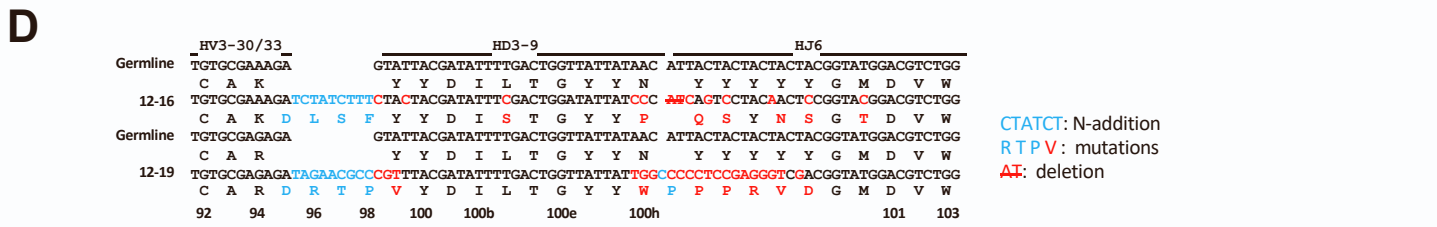

**Figure S2. Genetic analysis for mAbs12-16 and 12-19.**

(A) Germline gene assignment for mAbs 12-16 and 12-19.

(B) Gene-specific substitution profile (GSSP) for mAb 12-16.

(C) Gene-specific substitution profile (GSSP) for mAb 12-19. For (B) and (C), the dots represent the conserved residues in antibody sequence, as compared with the germline gene. The CDRs are highlighted by rectangles.

(D) CDRH3 VDJ junction analysis for mAbs 12-16 and 12-19. Germline nucleotides and amino acid residues are shown in black with the corresponding junctions colored in light blue. Somatic hypermutations are colored in red. Nucleotides deleted by exonuclease trimming are indicated with strikethrough. The blue nucleotides represent the N and P nucleotide additions at the junctions.

See also **Figure 1**.

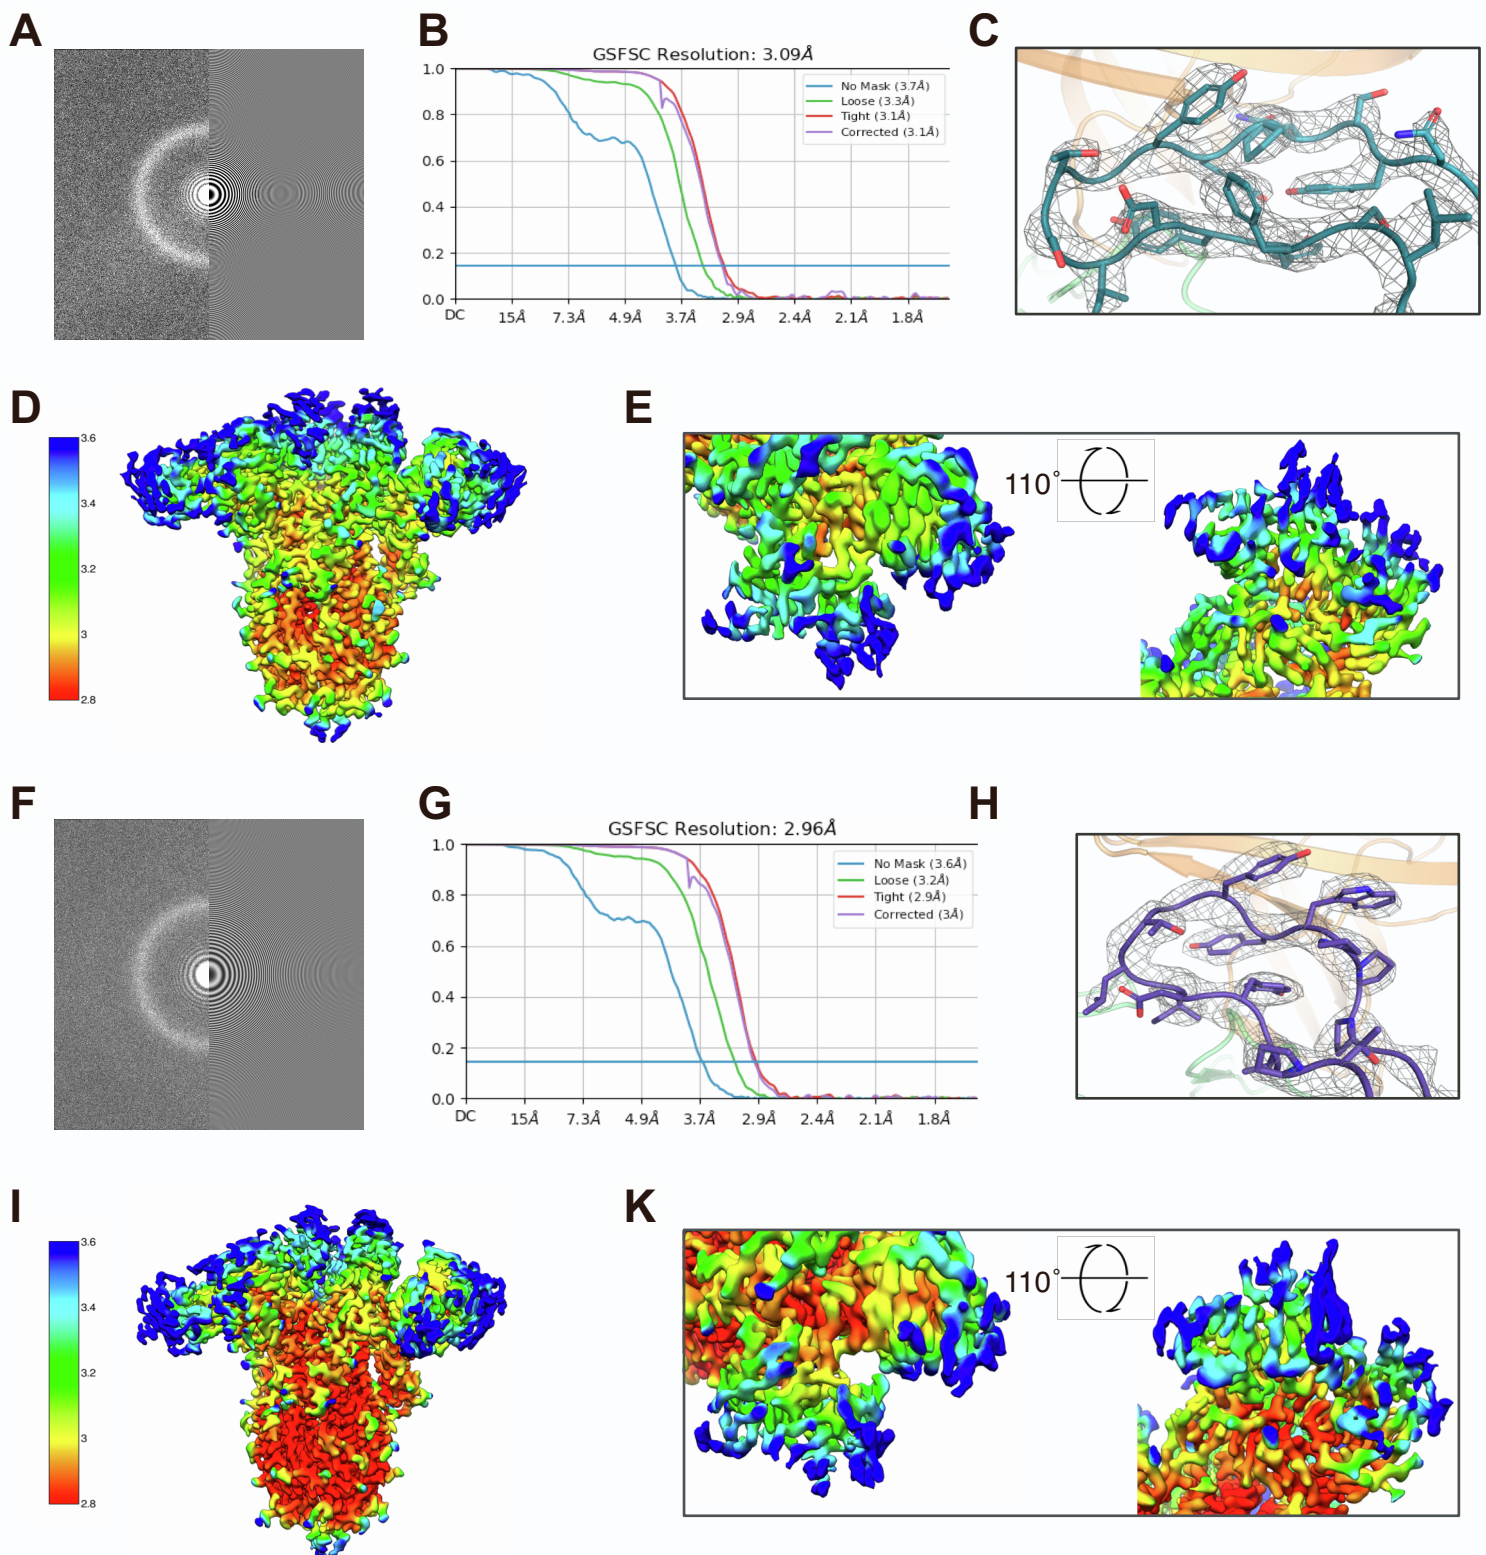

**Figure S3. Cryo-EM data for mAbs 12-16 (A - E) or 12-19 (F - K) in complex with SARS-CoV-2 D614G spike trimer.**

(A) and (F) Micrograph power spectrum (left) with contrast transfer function fit (right).

(B) and (G) Global refinement Fourier Shell Correlation curve showing overall resolution.

(C) and (H) Map density shown as mesh for mAb CDRH3 loop showing side chain fits. (D) and (I) Local resolution mapped onto global refinement reconstruction.

(E) and (K) Local resolution for the antibody interfaces, shown from top and bottom.

See also **Figure 2**.

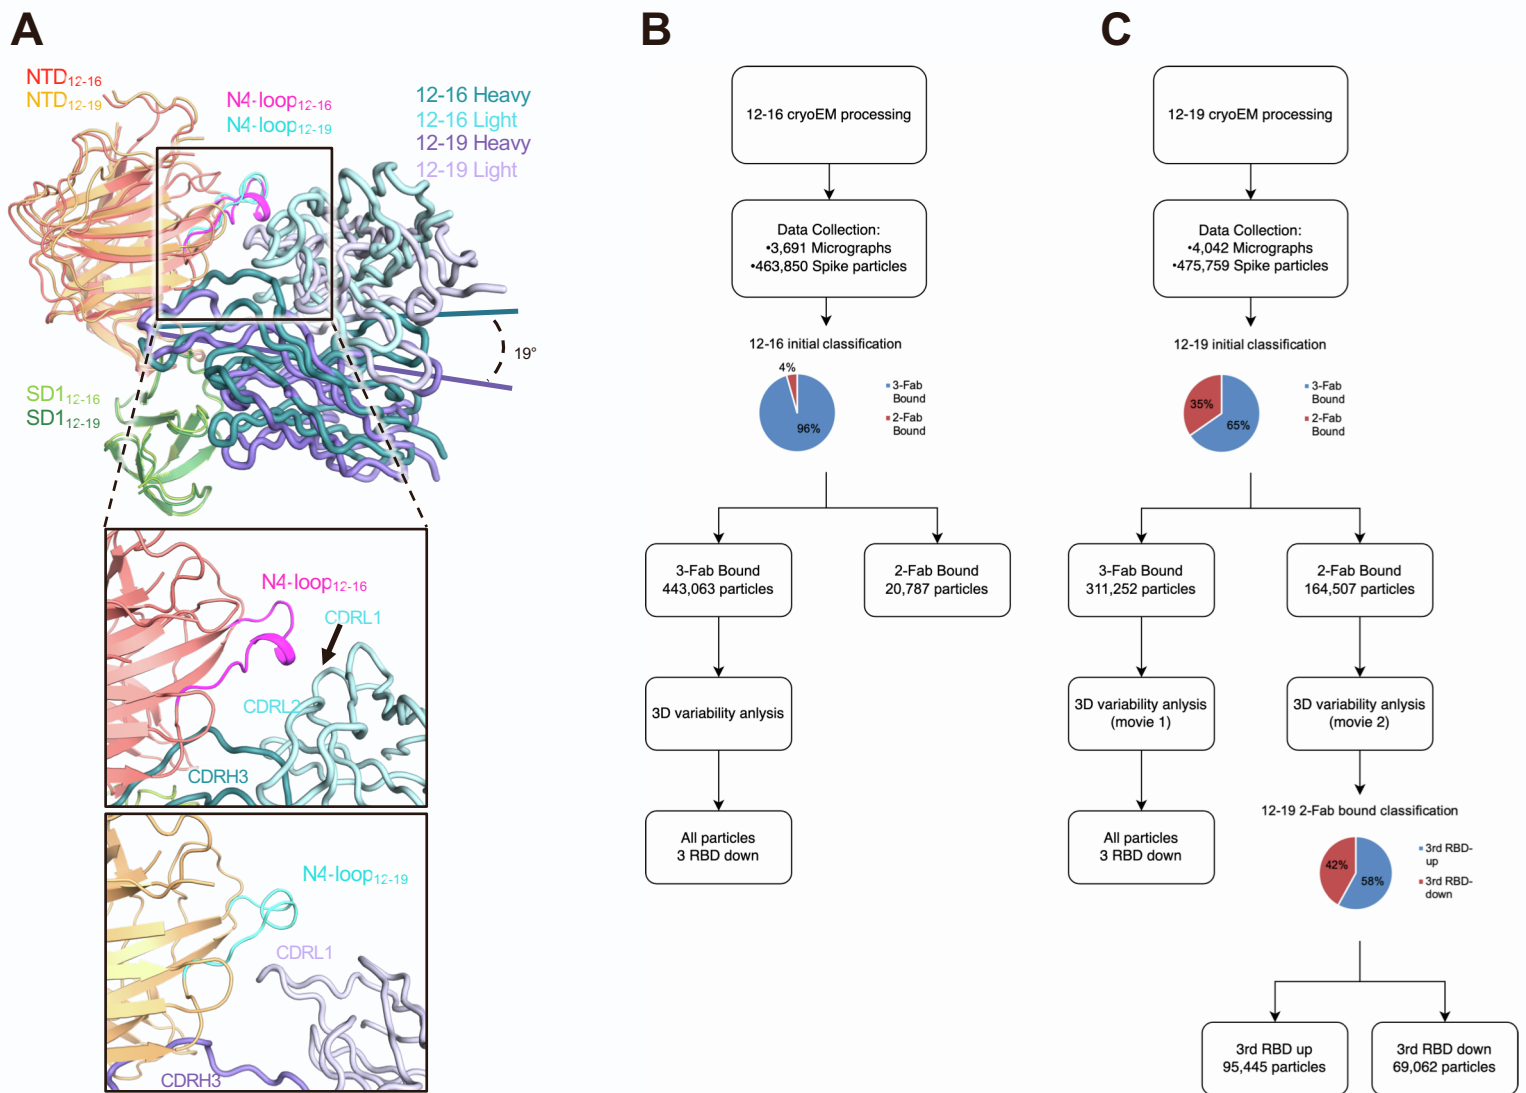

**Figure S4. Structural comparison of mAbs 12-16 and 12-19 bound to SD1 and NTD, and cryo-EM processing and particle classification pipeline.**

(A) The difference in angle of approach between heavy chains of 12-16 and 12-19 is shown. The close-up view highlights the CDR loop contacts between the antibody light chains and the N4-loop. See also **Figure 2**.

(B) For 12-16, nearly all spike particles were classified as 3-Fab-bound. See also **Figure 3**.

(C) For 12-19, spike particles were classified as 3- or 2-Fab-bound. See also **Figure 3**.

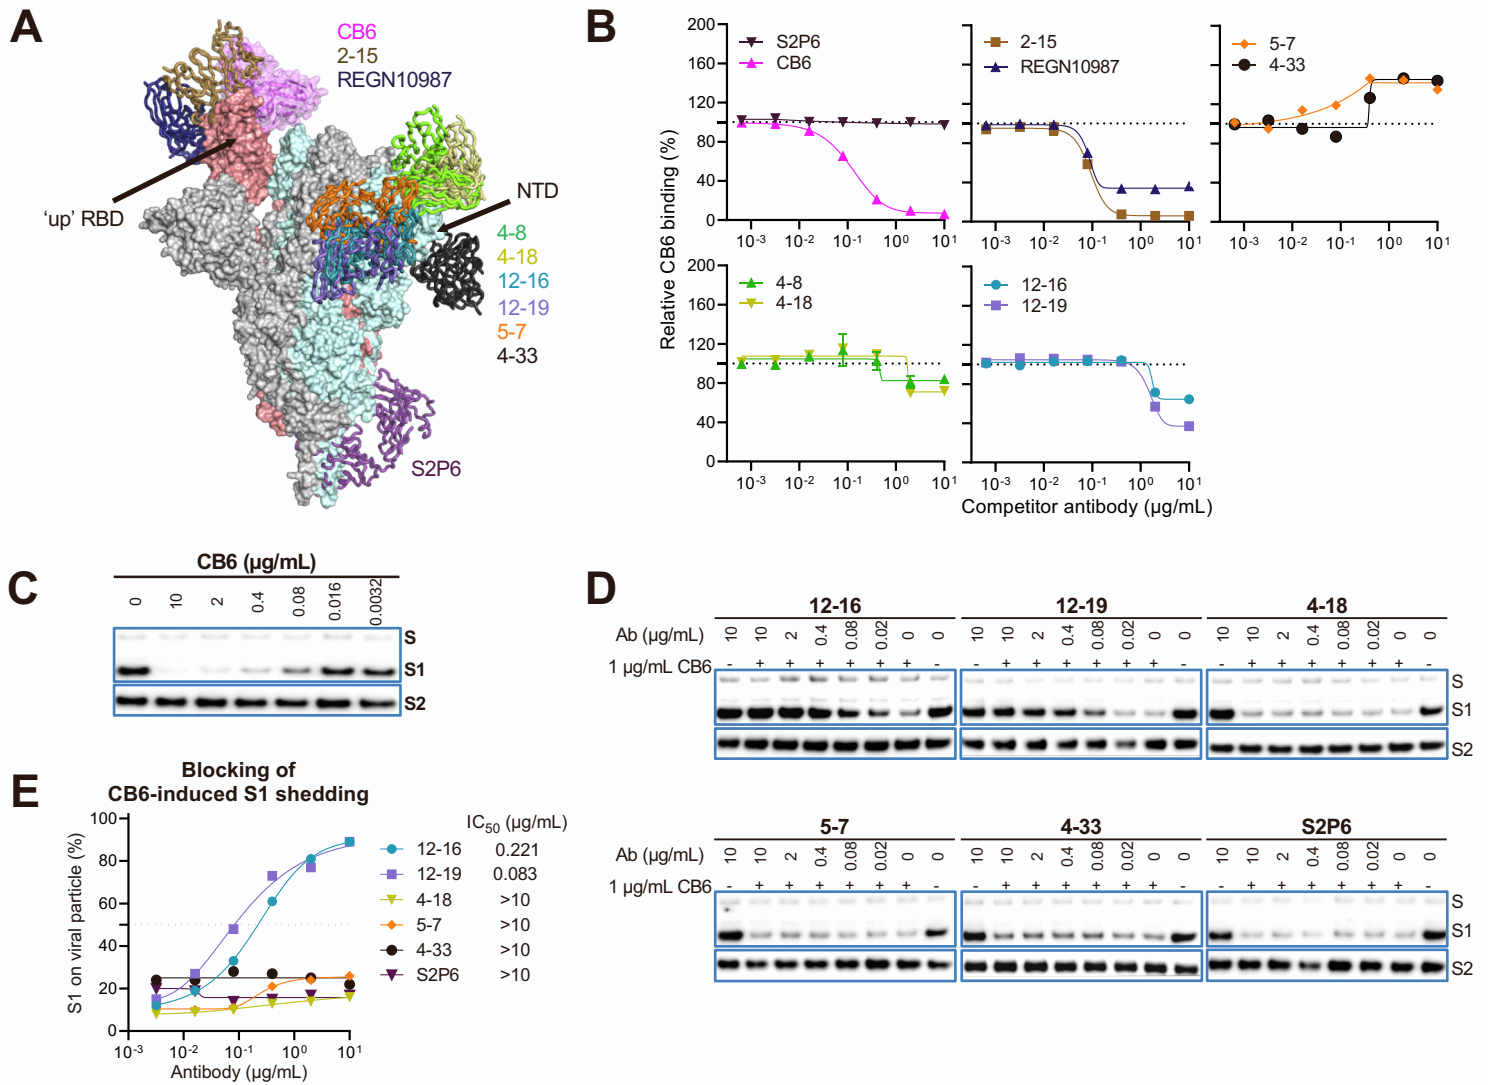

**Figure S5. 12-16 and 12-19 inhibit CB6-spike binding and CB6-induced S1 shedding.**

- (A) Antibodies in complex with SARS-CoV-2 spike with one RBD in the up position (PDB: 7KRR). All of these antibodies can neutralize SARS-CoV-2 except 4-33. CB6 targets the RBD in the “up” position exclusively.
- (B) Competition assay of CB6 binding to cell surface-expressed SARS-CoV-2 D614G spike in the presence of competitor antibodies. The data are shown as the mean  $\pm$  SEM.
- (C) CB6-induced S1 shedding from SARS-CoV-2 virions. D614G pseudovirus particles were incubated with CB6 at different doses for one hour at 37°C before the retained S1 and S2 subunits were determined by western blot.
- (D) Inhibition of CB6-induced S1 shedding from the spike trimers on SARS-CoV-2 virions by the indicated antibodies. D614G pseudovirus particles were incubated with the indicated antibodies for one hour prior to incubating with 1  $\mu\text{g/mL}$  CB6 for another one hour. The retained S1 and S2 subunits were determined by western blot.
- (E) The intensities of the S1 and S2 glycoprotein bands in (D) were measured and the S1/S2 ratios are shown. Numbers denote the concentration of each antibody which inhibited half of the shedding of S1.

The results in **B**, **C**, **D**, and **E** are representative of those obtained in two independent experiments. See also **Figure 4**.



**A**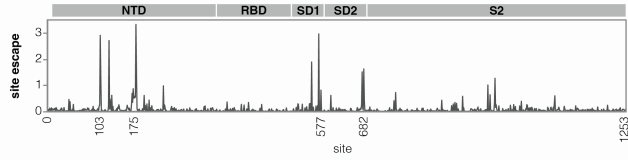**B**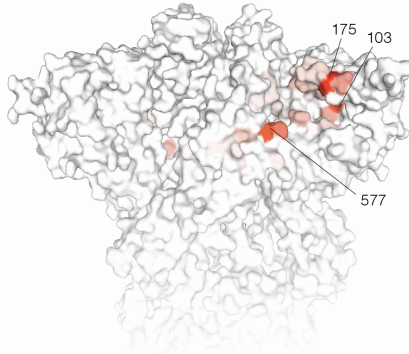**C**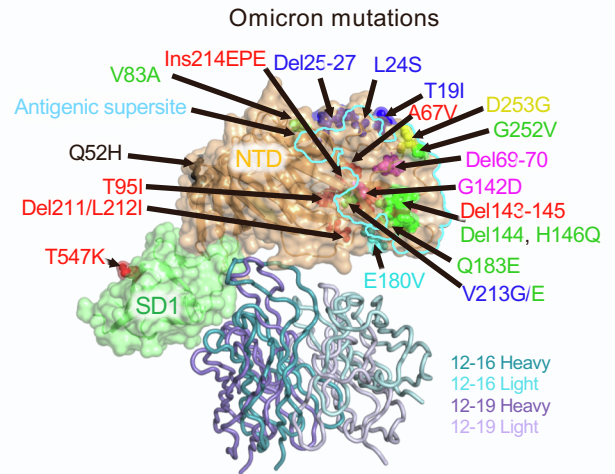**D**

|               | NTD |     |     |     |     |     |     |     |     |     |     |     |     |     |     | SD1 |     |     |     |     |     |   |   |   |   |   |   |   |   |   |   |   |   |   |   |   |   |   |   |   |   |   |   |   |   |   |   |   |   |
|---------------|-----|-----|-----|-----|-----|-----|-----|-----|-----|-----|-----|-----|-----|-----|-----|-----|-----|-----|-----|-----|-----|---|---|---|---|---|---|---|---|---|---|---|---|---|---|---|---|---|---|---|---|---|---|---|---|---|---|---|---|
| 12-19 epitope | 41  | 126 | 128 | 168 | 178 | 188 | 205 | 207 | 224 | 229 | 328 | 332 | 360 | 522 | 535 | 555 | 562 | 564 | 577 | 580 | 584 |   |   |   |   |   |   |   |   |   |   |   |   |   |   |   |   |   |   |   |   |   |   |   |   |   |   |   |   |
| SARS-CoV-2    | K   | V   | I   | F   | E   | Y   | V   | S   | Q   | P   | F   | L   | M   | D   | N   | S   | H   | E   | P   | L   | V   | D | L | R | I | N | P | A | T | K | S | N | K | K | F | L | P | F | Q | R | Q | T | L | E | I |   |   |   |   |
| RaTG13        | .   | .   | .   | .   | .   | .   | .   | .   | .   | .   | .   | .   | .   | .   | .   | .   | .   | .   | .   | .   | .   | . | . | . | . | . | . | . | . | . | . | . | . | . | . | . | . | . | . | . | . | . |   |   |   |   |   |   |   |
| Pangolin-GX   | .   | .   | .   | .   | .   | .   | .   | .   | .   | .   | .   | .   | .   | .   | .   | .   | .   | .   | .   | .   | .   | . | . | . | . | . | . | . | . | . | . | . | . | . | . | . | . | . | . | . | . | . |   |   |   |   |   |   |   |
| Pangolin-GD   | T   | .   | .   | .   | .   | .   | .   | .   | .   | .   | .   | .   | .   | .   | .   | .   | .   | .   | .   | .   | .   | . | . | . | . | . | . | . | . | . | . | . | . | . | . | . | . | . | . | . | . | . |   |   |   |   |   |   |   |
| WIV1          | D   | L   | .   | .   | .   | .   | .   | .   | .   | .   | .   | .   | .   | .   | D   | .   | Y   | K   | .   | I   | F   | K | . | . | . | . | . | . | . | . | . | . | . | . | . | . | . | . | . | . | . | . | . | . | . | . | . |   |   |
| LYRa11        | D   | .   | .   | .   | .   | .   | .   | .   | .   | .   | .   | .   | .   | .   | H   | .   | F   | K   | .   | L   | K   | . | . | . | . | . | . | . | . | . | . | . | . | . | . | . | . | . | . | . | . | . | . | . | . | . |   |   |   |
| Rs7327        | D   | L   | .   | .   | .   | .   | .   | .   | .   | .   | .   | .   | .   | .   | D   | .   | Y   | K   | .   | I   | F   | K | . | . | . | . | . | . | . | . | . | . | . | . | . | . | . | . | . | . | . | . | . | . | . | . | . | . |   |
| Rs4231        | E   | .   | .   | .   | .   | .   | .   | .   | .   | .   | .   | .   | .   | .   | H   | K   | Y   | K   | .   | I   | F   | K | . | . | . | . | . | . | . | . | . | . | . | . | . | . | . | . | . | . | . | . | . | . | . | . | . |   |   |
| Rs4084        | D   | L   | .   | .   | .   | .   | .   | .   | .   | .   | .   | .   | .   | .   | D   | .   | Y   | K   | .   | I   | F   | K | . | . | . | . | . | . | . | . | . | . | . | . | . | . | . | . | . | . | . | . | . | . | . | . | . | . |   |
| SHC014        | D   | L   | .   | .   | .   | .   | .   | .   | .   | .   | .   | .   | .   | .   | D   | .   | Y   | K   | .   | I   | F   | K | . | . | . | . | . | . | . | . | . | . | . | . | . | . | . | . | . | . | . | . | . | . | . | . | . | . |   |
| SARS-CoV      | E   | .   | .   | .   | .   | .   | .   | .   | .   | .   | .   | .   | .   | .   | H   | K   | Y   | K   | .   | I   | F   | K | . | . | . | . | . | . | . | . | . | . | . | . | . | . | . | . | . | . | . | . | . | . | . | . | . |   |   |
| HP03          | E   | .   | .   | .   | .   | .   | .   | .   | .   | .   | .   | .   | .   | .   | H   | K   | Y   | K   | .   | I   | F   | K | . | . | . | . | . | . | . | . | . | . | . | . | . | . | . | . | . | . | . | . | . | . | . | . | . |   |   |
| WIV16         | E   | .   | .   | .   | .   | .   | .   | .   | .   | .   | .   | .   | .   | .   | H   | K   | Y   | K   | .   | I   | F   | K | . | . | . | . | . | . | . | . | . | . | . | . | . | . | . | . | . | . | . | . | . | . | . | . | . |   |   |
| Rs7237        | D   | L   | .   | .   | .   | .   | .   | .   | .   | .   | .   | .   | .   | .   | D   | .   | Y   | K   | .   | I   | F   | K | . | . | . | . | . | . | . | . | . | . | . | . | . | . | . | . | . | . | . | . | . | . | . | . | . | . |   |
| Rf4092        | D   | I   | .   | .   | .   | .   | .   | .   | .   | .   | .   | .   | .   | .   | H   | G   | Y   | K   | .   | W   | K   | . | . | . | . | . | . | . | . | . | . | . | . | . | . | . | . | . | . | . | . | . | . | . | . | . |   |   |   |
| HKU3-13       | D   | I   | .   | .   | .   | .   | .   | .   | .   | .   | .   | .   | .   | .   | D   | R   | Y   | K   | .   | I   | L   | K | . | . | . | . | . | . | . | . | . | . | . | . | . | . | . | . | . | . | . | . | . | . | . | . | . | . |   |
| HKU3-1        | D   | I   | .   | .   | .   | .   | .   | .   | .   | .   | .   | .   | .   | .   | D   | Q   | Y   | K   | .   | I   | L   | K | . | . | . | . | . | . | . | . | . | . | . | . | . | . | . | . | . | . | . | . | . | . | . | . | . | . |   |
| As6526        | D   | I   | .   | .   | .   | .   | .   | .   | .   | .   | .   | .   | .   | .   | D   | Q   | Y   | R   | .   | I   | L   | K | . | . | . | . | . | . | . | . | . | . | . | . | . | . | . | . | . | . | . | . | . | . | . | . | . | . | . |
| GX2013        | D   | I   | .   | .   | .   | .   | .   | .   | .   | .   | .   | .   | .   | .   | D   | Q   | Y   | R   | .   | I   | L   | K | . | . | . | . | . | . | . | . | . | . | . | . | . | . | . | . | . | . | . | . | . | . | . | . | . | . |   |
| Rs4081        | D   | I   | .   | .   | .   | .   | .   | .   | .   | .   | .   | .   | .   | .   | D   | N   | Y   | K   | .   | I   | L   | K | . | . | . | . | . | . | . | . | . | . | . | . | . | . | . | . | . | . | . | . | . | . | . | . | . |   |   |
| 279_2005      | D   | I   | .   | .   | .   | .   | .   | .   | .   | .   | .   | .   | .   | .   | D   | Q   | Y   | R   | .   | I   | L   | K | . | . | . | . | . | . | . | . | . | . | . | . | . | . | . | . | . | . | . | . | . | . | . | . | . | . |   |
| Rp3           | D   | I   | .   | .   | .   | .   | .   | .   | .   | .   | .   | .   | .   | .   | D   | Q   | Y   | R   | .   | I   | L   | K | . | . | . | . | . | . | . | . | . | . | . | . | . | . | . | . | . | . | . | . | . | . | . | . | . | . |   |
| Yunnan2011    | D   | I   | .   | .   | .   | .   | .   | .   | .   | .   | .   | .   | .   | .   | D   | H   | Y   | K   | .   | I   | L   | K | . | . | . | . | . | . | . | . | . | . | . | . | . | . | . | . | . | . | . | . | . | . | . | . | . |   |   |
| Rs4237        | D   | I   | .   | .   | .   | .   | .   | .   | .   | .   | .   | .   | .   | .   | D   | Q   | Y   | R   | .   | I   | L   | K | . | . | . | . | . | . | . | . | . | . | . | . | . | . | . | . | . | . | . | . | . | . | . | . | . | . |   |
| Longquan_140  | D   | I   | .   | .   | .   | .   | .   | .   | .   | .   | .   | .   | .   | .   | D   | Q   | Y   | R   | .   | I   | L   | K | . | . | . | . | . | . | . | . | . | . | . | . | . | . | . | . | . | . | . | . | . | . | . | . | . | . |   |
| Shaanxi2011   | D   | I   | V   | .   | .   | .   | .   | .   | .   | .   | .   | .   | .   | .   | H   | .   | Y   | K   | .   | V   | M   | S | . | . | . | . | . | . | . | . | . | . | . | . | . | . | . | . | . | . | . | . | . | . | . | . | . |   |   |
| HeB2013       | D   | I   | .   | .   | .   | .   | .   | .   | .   | .   | .   | .   | .   | .   | D   | Q   | Y   | K   | .   | I   | L   | K | . | . | . | . | . | . | . | . | . | . | . | . | . | . | . | . | . | . | . | . | . | . | . | . | . | . |   |
| HuB2013       | D   | I   | V   | .   | .   | .   | .   | .   | .   | .   | .   | .   | .   | .   | H   | .   | Y   | K   | .   | I   | M   | S | . | . | . | . | . | . | . | . | . | . | . | . | . | . | . | . | . | . | . | . | . | . | . | . | . |   |   |
| Rs4247        | D   | I   | .   | .   | .   | .   | .   | .   | .   | .   | .   | .   | .   | .   | D   | Q   | Y   | R   | .   | I   | L   | K | . | . | . | . | . | . | . | . | . | . | . | . | . | . | . | . | . | . | . | . | . | . | . | . | . | . |   |
| Rf1           | D   | I   | .   | .   | .   | .   | .   | .   | .   | .   | .   | .   | .   | .   | D   | Q   | Y   | K   | .   | I   | L   | K | . | . | . | . | . | . | . | . | . | . | . | . | . | . | . | . | . | . | . | . | . | . | . | . | . | . |   |
| 273_2005      | D   | I   | .   | .   | .   | .   | .   | .   | .   | .   | .   | .   | .   | .   | D   | Q   | Y   | K   | .   | I   | L   | K | . | . | . | . | . | . | . | . | . | . | . | . | . | . | . | . | . | . | . | . | . | . | . | . | . | . |   |
| HKU3-8        | D   | I   | .   | .   | .   | .   | .   | .   | .   | .   | .   | .   | .   | .   | D   | Q   | Y   | R   | .   | I   | L   | K | . | . | . | . | . | . | . | . | . | . | . | . | . | . | . | . | . | . | . | . | . | . | . | . | . | . |   |
| YN2013        | D   | L   | V   | .   | .   | .   | .   | .   | .   | .   | .   | .   | .   | .   | D   | E   | Y   | K   | .   | L   | K   | I | . | . | . | . | . | . | . | . | . | . | . | . | . | . | . | . | . | . | . | . | . | . | . | . | . |   |   |
| JL2012        | D   | I   | .   | .   | .   | .   | .   | .   | .   | .   | .   | .   | .   | .   | H   | G   | Y   | K   | .   | W   | K   | . | . | . | . | . | . | . | . | . | . | . | . | . | . | . | . | . | . | . | . | . | . | . | . | . |   |   |   |
| RmYN02        | D   | .   | .   | .   | .   | .   | .   | .   | .   | .   | .   | .   | .   | .   | R   | G   | Y   | I   | .   | W   | K   | . | . | . | . | . | . | . | . | . | . | . | . | . | . | . | . | . | . | . | . | . | . | . | . | . |   |   |   |
| ZXC21         | T   | .   | .   | .   | .   | .   | .   | .   | .   | .   | .   | .   | .   | .   | T   | .   | F   | Q   | .   | .   | .   | . | . | . | . | . | . | . | . | . | . | . | . | . | . | . | . | . | . | . | . | . | . | . | . | . |   |   |   |
| ZC45          | T   | .   | .   | .   | .   | .   | .   | .   | .   | .   | .   | .   | .   | .   | T   | .   | F   | Q   | .   | .   | .   | . | . | . | . | . | . | . | . | . | . | . | . | . | . | . | . | . | . | . | . | . | . | . | . | . |   |   |   |
| BM48-31       | D   | I   | .   | .   | .   | .   | .   | .   | .   | .   | .   | .   | .   | .   | H   | H   | Y   | K   | .   | I   | L   | K | . | . | . | . | . | . | . | . | . | . | . | . | . | . | . | . | . | . | . | . | . | . | . | . | . |   |   |
| BtKY72        | D   | I   | .   | .   | .   | .   | .   | .   | .   | .   | .   | .   | .   | .   | H   | H   | Y   | K   | .   | I   | F   | K | . | . | . | . | . | . | . | . | . | . | . | . | . | . | . | . | . | . | . | . | . | . | . | . | . |   |   |

SARS-CoV-2 clade

SARS-CoV and SARS relate Bat CoV clade

Asia clade 2 sarbecovirus

Afica/Eurpe sarbecovirus

**Figure S6. Key spike escape mutations of 12-19 identified by deep mutational scanning and sequence alignment of the 12-19 epitope across selected sarbecoviruses.**

- (A) Mean escape scores for 12-19 antibody at each site in the BA.1 spike.
- (B) Surface representation of spike colored by mean of escape scores at that site. PDB ID: 6XR8. Site numbering is based on the Wuhan-Hu-1 sequence.
- (C) Antibodies 12-16 and 12-19 in complex with NTD and SD1. The NTD antigenic supersite is outlined in cyan. The mutations observed in VOCs are denoted as spheres. Omicron BA.1, BA.2 (or BA.4/5, BQ.1), XBB.1, XBB.1.16, XBB.2.3, EG.5.1, and shared mutations in at least two variants are colored in red, blue, green, cyan, yellow, black, and magenta, respectively.
- (D) The sequence positioning is aligned according to SARS-CoV-2, and dots represent the residues conserved across different viruses.

See also **Figure 6**.
